# Supplementary material for: Synergistic Effects of High-Intensity Ultrasound Combined with L-Lysine for the Treatment of Porcine Myofibrillar Protein Regarding Solubility and Flavour Adsorption Capacity
Source: MDPI journal article supplement (doi:10.3390/foods13040629), 2024-02-19
Supplement: s1 [file s1]

## Supplementary Material

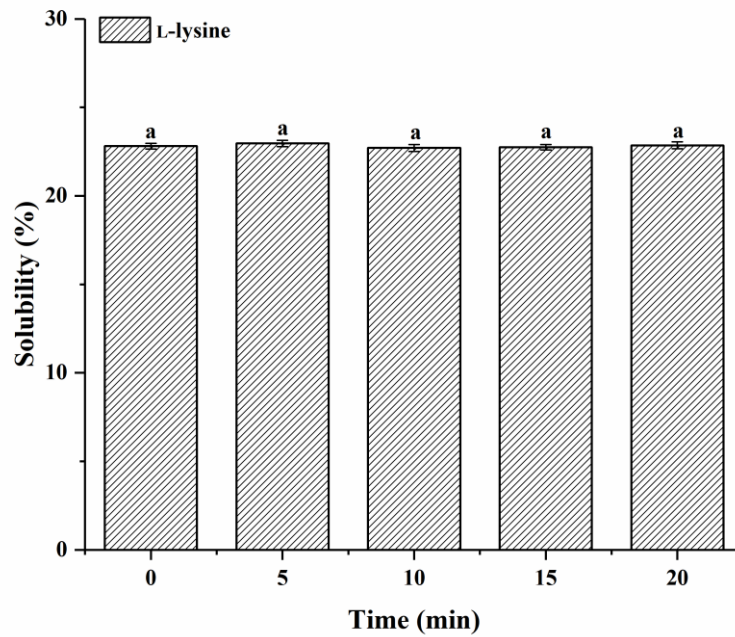

**Figure S1.** Effect of L-lysine alone on the solubility of myofibrillar proteins. The letters above the bars indicate a significant difference ( $p < 0.05$ ).

**Table S1.** The probability level ( $p$ -value) for experimental main factor (ultrasound time and L-lysine) and their interaction effects on MP.

| Experimental factor and<br>interaction of experimental<br>factors | Solubility | turbidity | Particle size of D <sub>43</sub> | Reactive<br>sulfhydryl | 2-pentanone | 2-hexanone | 2-heptanone | 2-octanone |
|-------------------------------------------------------------------|------------|-----------|----------------------------------|------------------------|-------------|------------|-------------|------------|
| ultrasound time                                                   | <0.05      | <0.05     | <0.05                            | <0.05                  | >0.05       | >0.05      | >0.05       | >0.05      |
| L-lysine                                                          | <0.05      | <0.05     | <0.05                            | <0.05                  | <0.05       | <0.05      | <0.05       | <0.05      |
| ultrasound time × L-lysine                                        | <0.05      | <0.05     | <0.05                            | <0.05                  | >0.05       | >0.05      | >0.05       | >0.05      |
